# Supplementary material for: Canine Mucosal Artificial Colon: development of a new colonic in vitro model adapted to dog sizes
Source: Springer Nature journal article supplement (doi:10.1007/s00253-023-12987-2), 2024-01-23
Supplement: MOESM1 [file 253_2023_12987_MOESM1_ESM.pdf]

**Canine Mucosal Artificial Colon: development of a new colonic in vitro model adapted to dog sizes**

Charlotte Deschamps<sup>1,2</sup>, Sylvain Denis<sup>1</sup>, Delphine Humbert<sup>3</sup>, Nathalie Priymenko<sup>4</sup>, Sandrine Chalancon<sup>1</sup>, Jana De Bodt<sup>5</sup>, Tom Van de Wiele<sup>5</sup>, Ignacio Ipharraguerre<sup>6</sup>, Inma Alvarez-Acero<sup>7</sup>, Caroline Achard<sup>2</sup>, Emmanuelle Apper<sup>2</sup>, Stéphanie Blanquet-Diot<sup>1\*</sup>

<sup>1</sup>Université Clermont Auvergne, UMR 454 MEDIS UCA-INRAE, F-63000 Clermont-Ferrand, France. <sup>2</sup>Lallemand Animal Nutrition, F-31702 Blagnac Cedex, France. <sup>3</sup>Dômes Pharma, 63430 Pont-du-Château, France.

<sup>4</sup>University of Toulouse, Toxalim (Research Center in Food Toxicology), INRAE, ENVT, INP-Purpan, UPS, 31000 Toulouse, France. <sup>5</sup>Center for Microbial Ecology and Technology (CMET), Faculty of Bioscience Engineering, Ghent University, Ghent, Belgium. <sup>6</sup>Institute of Human Nutrition and Food Science, University of Kiel, Germany. <sup>7</sup>Institute of Food Science, Technology and Nutrition, Spanish National Research Council (ICTAN-CSIC), Madrid, Spain.

**\*Corresponding address:**

Stéphanie Blanquet-Diot

UMR 454 MEDIS

University Clermont Auvergne, INRAE

28, place Henri Dunant

63000 Clermont-Ferrand, France

(+33473178390, [stephanie.blanquet@uca.fr](mailto:stephanie.blanquet@uca.fr))

### Supplementary tables

**Supplemental Table S1** Characteristics of healthy adult dogs included in the study and ranked by small, medium and large dog sizes

M: male, F: female, BCS: body condition score (ranging from 1 -very thin- to 5 -obese-, 3 corresponding to ideal weight)

| Size   | Dog_id | Breed                     | Sex | Sterilization | Age (years) | BCS | Weight (kg) | Garden access | Feed |
|--------|--------|---------------------------|-----|---------------|-------------|-----|-------------|---------------|------|
| Small  | S1     | Shih Tzu                  | M   | No            | 6           | 3   | 5           | No            | Dry  |
|        | S2     | Chihuahua                 | F   | No            | 7           | 3   | 1,9         | Yes           | Dry  |
|        | S3     | Cavalier King Charles     | F   | No            | 5.5         | 3   | 8           | No            | Dry  |
|        | S4     | Spitz                     | F   | Yes           | 2           | 3   | 4           | No            | Dry  |
| Medium | M1     | Border collie x Beauceron | M   | Yes           | 2.5         | 3   | 30          | Yes           | Dry  |
|        | M2     | French bulldogged         | F   | Yes           | 6           | 3   | 13          | Yes           | Dry  |
|        | M3     | Border collie             | M   | Yes           | 6           | 3   | 18          | Yes           | Dry  |
|        | M4     | Flat coater Retriever     | F   | No            | 2.5         | 3   | 28          | Yes           | Dry  |
|        | M5     | Golden Retriever          | F   | No            | 6.5         | 3   | 29          | Yes           | Dry  |
| Large  | L1     | Saint-Bernard             | M   | No            | 6           | 3   | 80          | Yes           | Dry  |
|        | L2     | Beauceron                 | F   | Yes           | 3           | 3   | 40          | Yes           | Dry  |
|        | L3     | Leonberg                  | F   | No            | 3           | 3   | 52          | Yes           | Dry  |
|        | L4     | German Shepherd           | M   | No            | 5           | 3   | 42          | Yes           | Dry  |

**Supplemental Table S2** Primers used for qPCR and 16S rRNA Metabarcoding analysis

| Primer names          | Sequence 5'-3'        | Target          | Annealing temperature (°C) | References                 |
|-----------------------|-----------------------|-----------------|----------------------------|----------------------------|
| qPCR primers          |                       |                 |                            |                            |
| BAC338R               | ACTCCTACGGGAGGCAG     | Total           | 58                         | Yu et al. (2005)           |
| BAC516F               | GTATTACCGCGGCTGCTG    | <i>Bacteria</i> |                            |                            |
| Metabarcoding primers |                       |                 |                            |                            |
| V3_F357_N             | CCTACGGGNGGCWGCAG     | <i>Bacteria</i> | -                          | Klindworth et al. (2013)   |
| V4_R805               | GACTACHVGGGTATCTAATCC |                 |                            |                            |
| Arch349F              | GYGCASCAGKCGMGAAW     | <i>Archaea</i>  | -                          | Takai and Horikoshi (2000) |
| Arch806R              | 5GGACTACVSGGGTATCTAAT |                 |                            |                            |

## Supplementary figures

### Microbiota composition

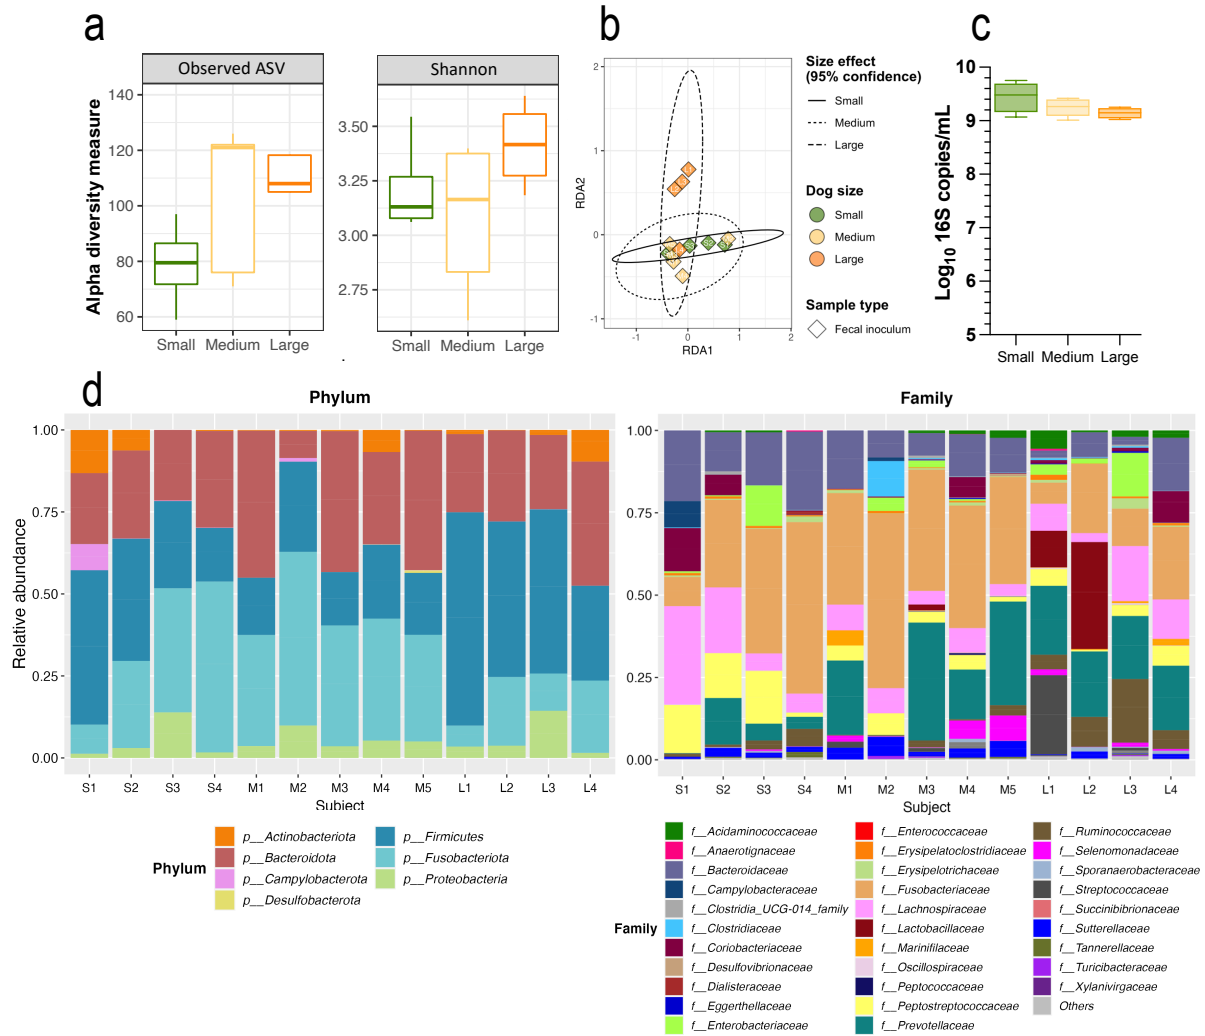

### Microbiota activity

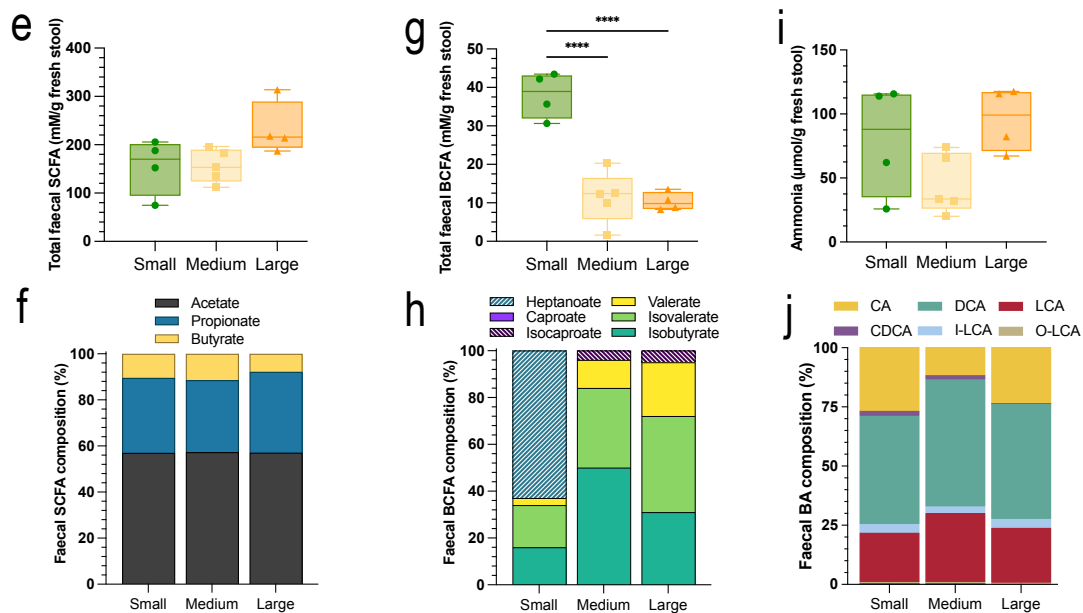

**Supplemental Fig. S1** Stool characterization for each canine donor

Stool samples were collected from 13 healthy dogs (n=4 small in green, n=5 medium in yellow and n=6 large in orange). Microbiota composition was analyzed by 16S Metabarcoding. Diversity indexes were calculated based on ASV table.  $\alpha$ -diversity (observed ASVs and Shannon Index) is represented as box plots for each dog size (**a**). Redundancy analysis (RDA) two-dimension plot visualizations reported bacterial community  $\beta$ -diversity, showing the effects of dog size (**b**), numbers refer to dog\_id mentioned in **Table S1**. Total bacteria were also determined by quantitative-PCR and plotted as boxplots (**c**). Bacterial abundances are shown at the phylum and family levels (**d**). The three main short-chain fatty acids (**e, f**), the six major branched-chain fatty acids (**g, h**), ammonia (**i**) and main primary and secondary bile acids (**j**) were quantified in the stool samples. Results are expressed as mean daily concentrations in mM/g of fresh stool  $\pm$  SD (**e, g, i**) or relative percentages (**f, h, j**). BCFA: branched-chain fatty acids, CA: cholic acid, CDCA: chenodeoxycholic acid, DCA: deoxycholic acid, I-LCA: isoallo-3-ketocholate, LCA: lithocholic acid, O-LCA: 3-oxolithocholic/dehydrolithocholic acid, SCFA: short-chain fatty acids. Statistical differences are indicated by \*\*\*\*:  $p < 0.0001$  (ANOVA one-way).

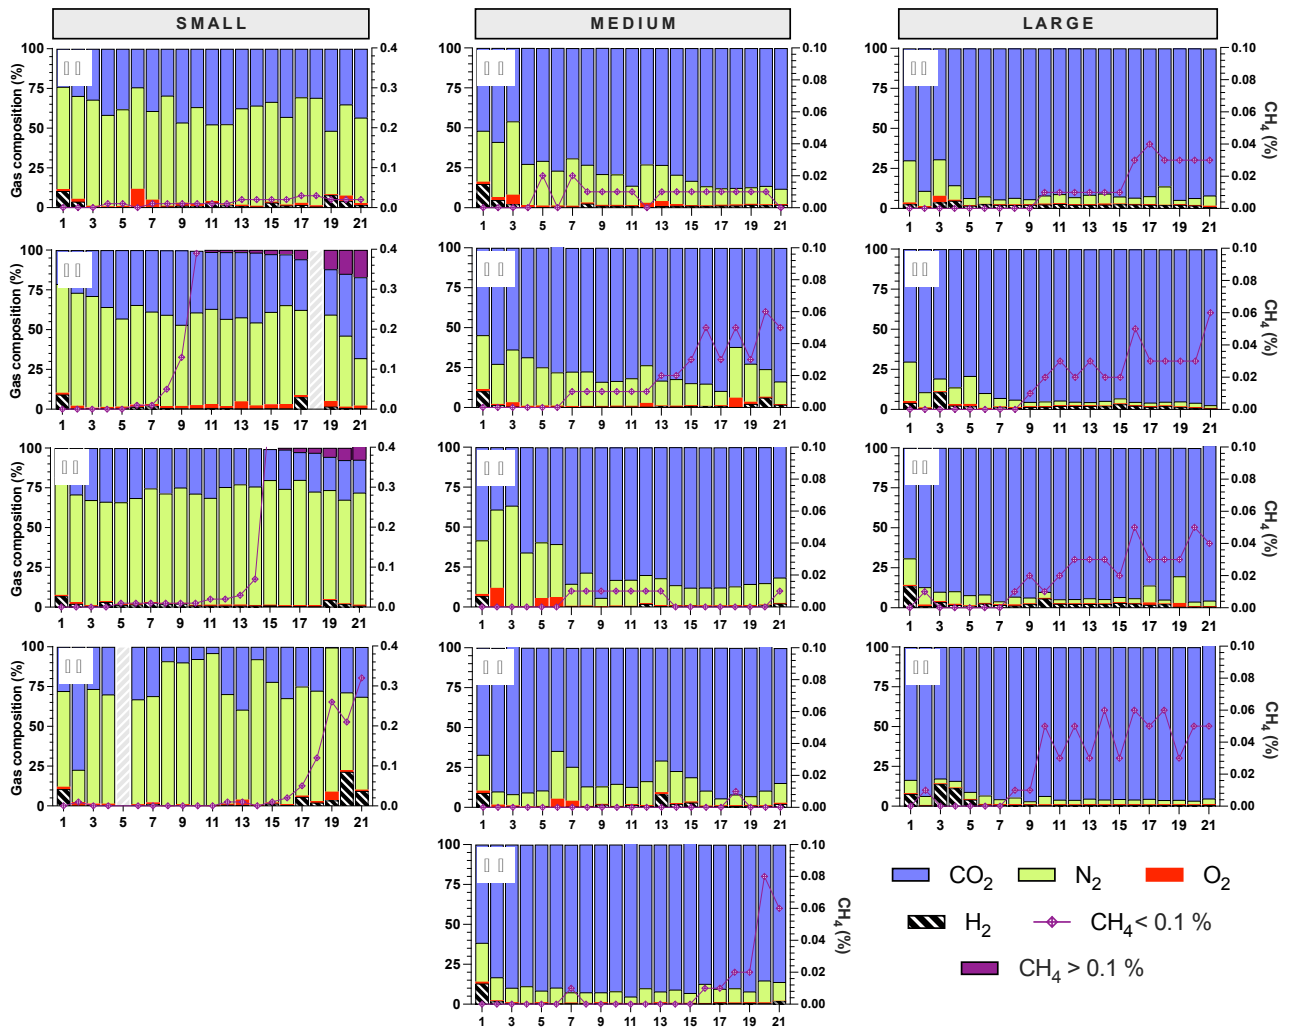

**Supplemental Fig. S2** Impact of three dog sizes on gas composition in the CANIM-ARCOL at the individual level

Fermentations were performed in the CANIM-ARCOL under three dog size conditions, when bioreactors were inoculated with fecal samples from 13 healthy dogs (n=4 small “S”, n=5 medium “M” and n=6 large “L”). Atmospheric phase of bioreactors was sampled daily to monitor gas composition throughout fermentations. Results are expressed as relative percentages of main gases. CH<sub>4</sub>: methane, CO<sub>2</sub>: carbon dioxide, H<sub>2</sub>: dihydrogen, N<sub>2</sub>: nitrogen, O<sub>2</sub>: dioxygen.

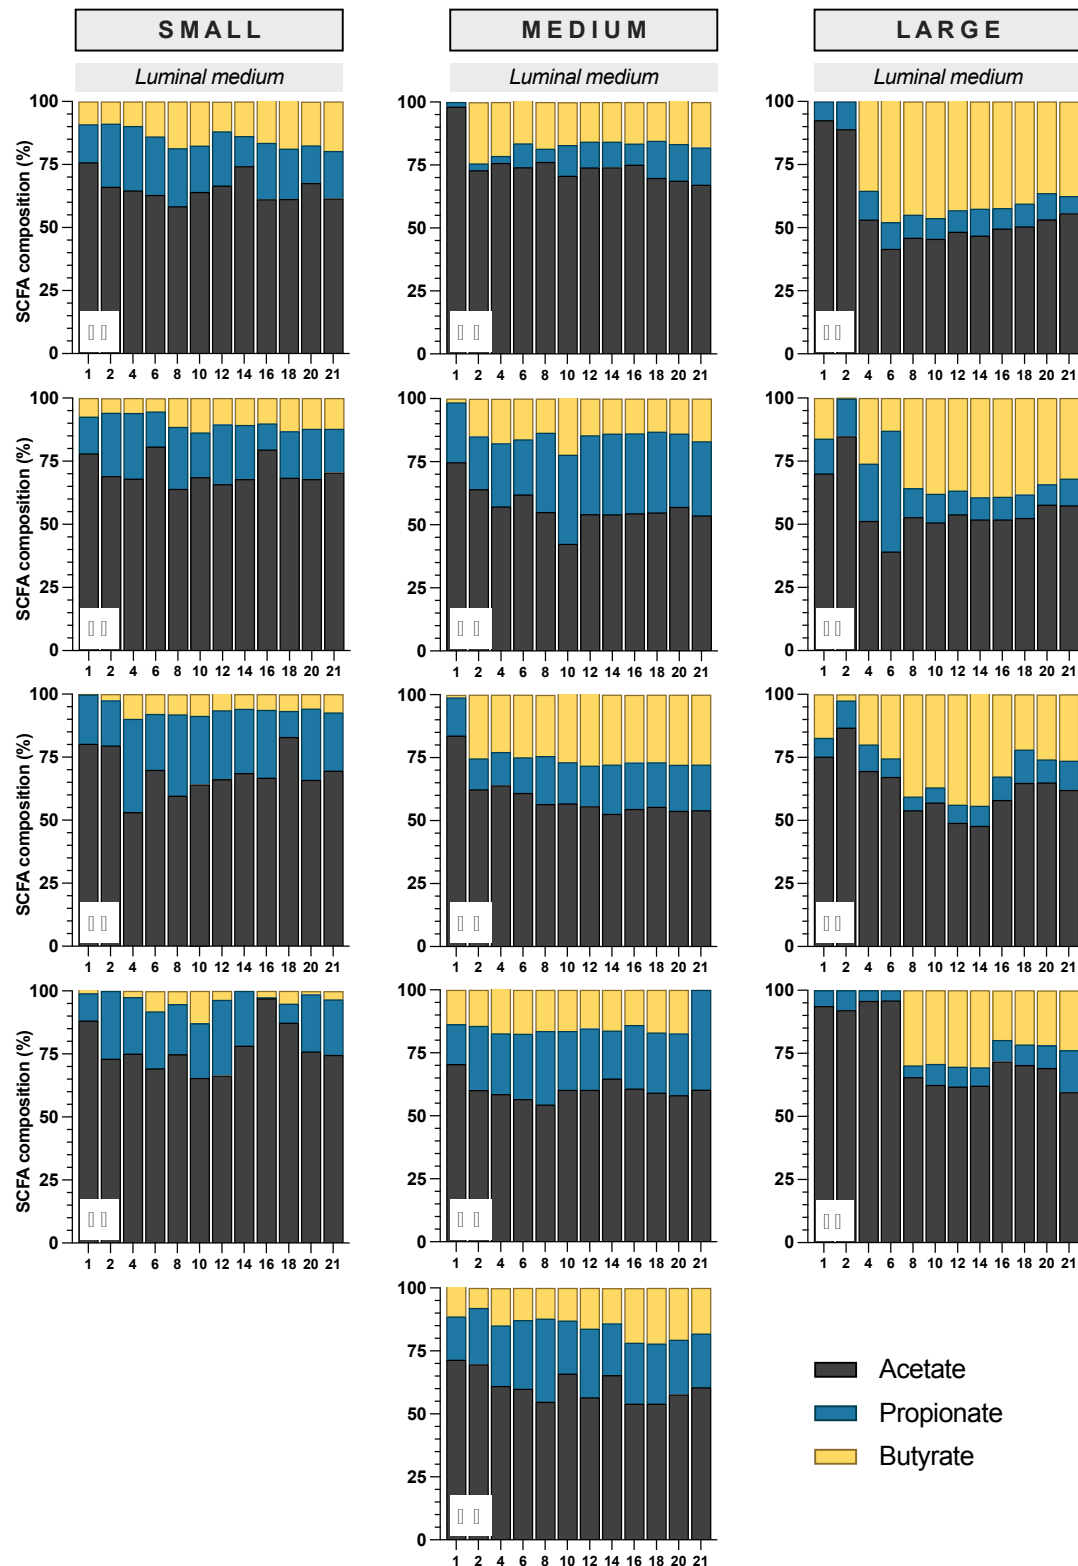

**Supplemental Fig. S3** Impact of three dog sizes on SCFA composition in the CANIM-ARCOL at the individual level

Fermentations were performed in the CANIM-ARCOL under three dog size conditions, when bioreactors were inoculated with fecal samples from 13 healthy dogs (n=4 small “S”, n=5 medium “M” and n=6 large “L”). Luminal medium of bioreactors was sampled daily to monitor short chain fatty acid composition throughout fermentations. Results are expressed as relative percentages of main SCFA (i.e. acetate, propionate and butyrate).

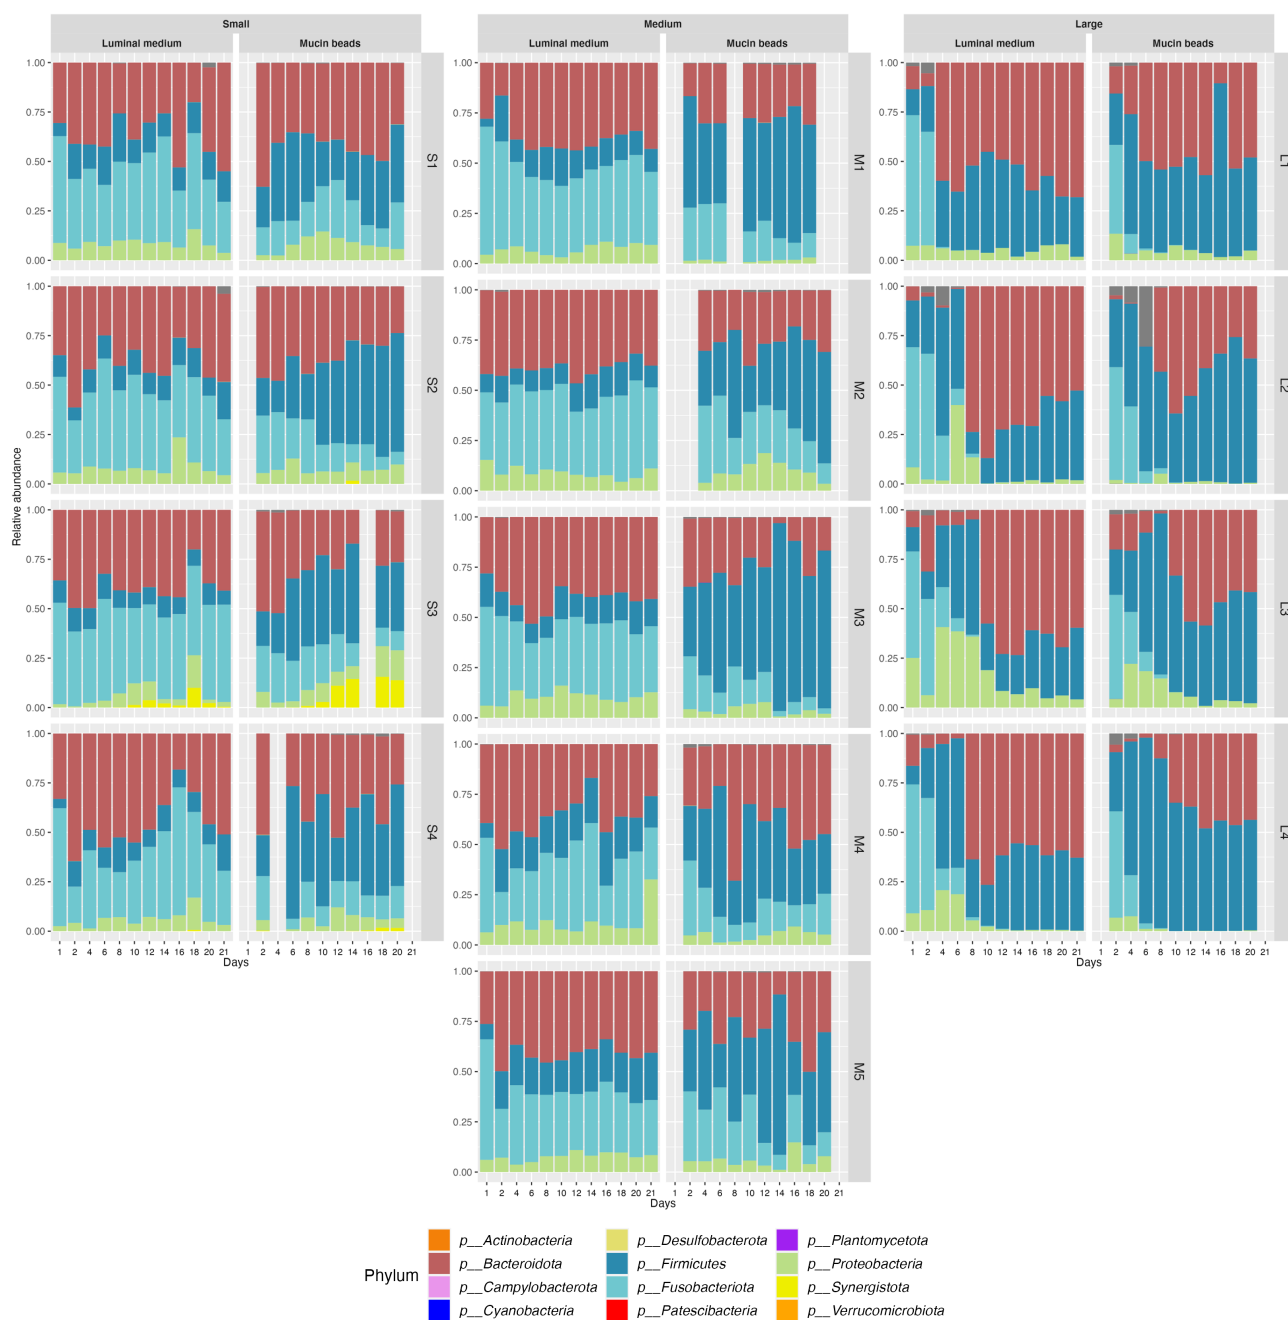

**Supplemental Fig. S4** Impact of three dog sizes on microbiota composition in the CANIM-ARCOL at the individual level

Fermentations were performed in the CANIM-ARCOL under three dog size conditions, when bioreactors were inoculated with fecal samples from 13 healthy dogs (n=4 small “S”, n=5 medium “M” and n=6 large “L”). Luminal medium of bioreactors and mucin beads were sampled daily to monitor microbiota composition at the phylum level. Results are expressed as relative abundances of main phyla.

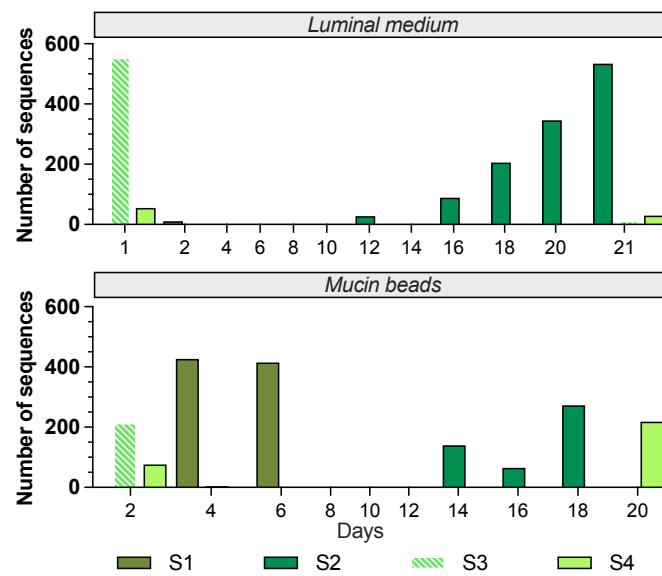

**Supplemental Fig. S5** Detection of methanogenic *Archaea* in the CANIM-ARCOL

Fermentations were performed in the CANIM-ARCOL under three dog size conditions, when bioreactors were inoculated with fecal samples from 13 healthy dogs (n=4 small “S”, n=5 medium “M” and n=6 large “L”). Luminal medium of bioreactors and mucin beads were sampled daily to monitor methanogenic *Archaea*. Results are expressed as archaeal sequence number (*Methanobrevibacter smithii* only) for small condition only, since no archaeal sequence was amplified from the medium and large samples.
